# Supplementary material for: Gut microbiota‐CRAMP axis shapes intestinal barrier function and immune responses in dietary gluten‐induced enteropathy
Source: EMBO Mol Med. 2021 Jun 14;13(8):e14059. doi: 10.15252/emmm.202114059 (PMC8350901; doi:10.15252/emmm.202114059)
Supplement: Supplementary file 2 — Expanded View Figures PDF [file EMMM-13-e14059-s005.pdf]

## Expanded View Figures

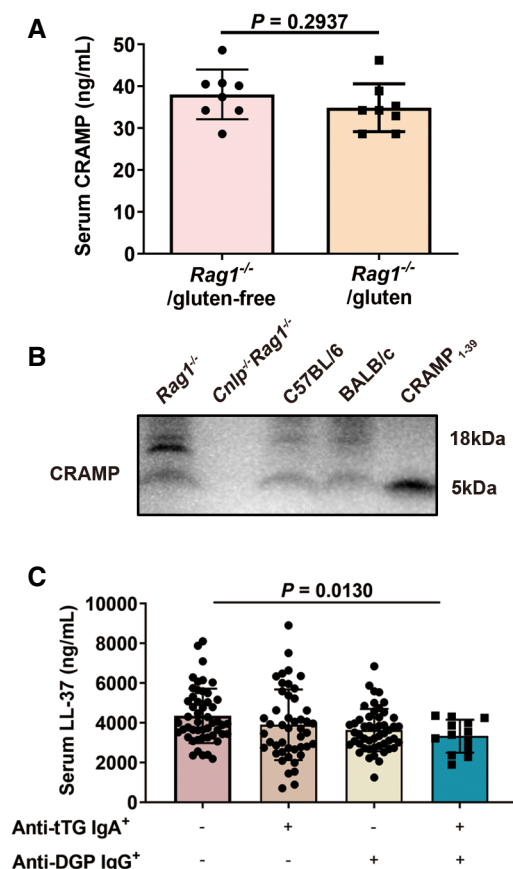

**Figure EV1.** The production of cathelicidin (CRAMP in mice and LL-37 in humans) in mice and in human subjects. Related to Fig 1.

A Serum CRAMP determination by ELISA.  $Rag1^{-/-}$ /gluten-free: unsensitized  $Rag1^{-/-}$  mice fed with gluten-free diet.  $Rag1^{-/-}$ /gluten: unsensitized  $Rag1^{-/-}$  mice fed with gluten-containing diet ( $n = 8$ ).

B Western blot of pro-form CRAMP and the mature peptide in duodenum of  $Rag1^{-/-}$ ,  $Cnlp^{-/-} Rag1^{-/-}$ , C57BL/6 and BALB/c mice.

C Serum LL-37 determination by ELISA. Anti-tTG IgA: anti-tissue transglutaminase immunoglobulin A antibodies. Anti-DGP IgG: anti-deamidated gliadin peptides immunoglobulin G antibodies (Anti-tTG IgA<sup>-</sup>Anti-DGP IgG<sup>-</sup>,  $n = 50$ ; Anti-tTG IgA<sup>+</sup>Anti-DGP IgG<sup>-</sup>,  $n = 46$ ; Anti-tTG IgA<sup>-</sup>Anti-DGP IgG<sup>+</sup>,  $n = 50$ ; Anti-tTG IgA<sup>+</sup>Anti-DGP IgG<sup>+</sup>,  $n = 13$ ).

Data information: Data (A, C) were representative and were the mean  $\pm$  SD from three independent experiments. Data in B were representative from three independent experiments.  $P$  values were calculated by unpaired two-tailed  $t$ -test for comparison of two groups (A) or one-way ANOVA followed by Tukey's *post hoc* test for multiple comparisons (C). Source data are available online for this figure.

**Figure EV2.** Replenishing CRAMP is protective against jejunal and ileal barrier damage during GIE. Related to Fig 3.

A, B CRAMP determinations in (A) jejunum and (B) ileum by ELISA ( $n = 6$ ).

C, D Representative images of (C) jejunal and (D) ileal damage by H&E staining. Scale bar: 200  $\mu$ m. The graphs depicted the ratio of the morphometric assessment of villus height to crypt depth ( $n = 6$ ).

E, F Western blot and densitometry analyses of tight junction proteins (claudin-1, occludin, ZO-1 and ZO-2) in (E) jejunum and (F) ileum ( $n = 4$ ).

Data information: Data were representative and were the mean  $\pm$  SD from three (A–D) or two (E, F) independent experiments.  $P$  values were calculated by one-way ANOVA followed by Tukey's *post hoc* test for multiple comparisons. Source data are available online for this figure.

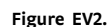

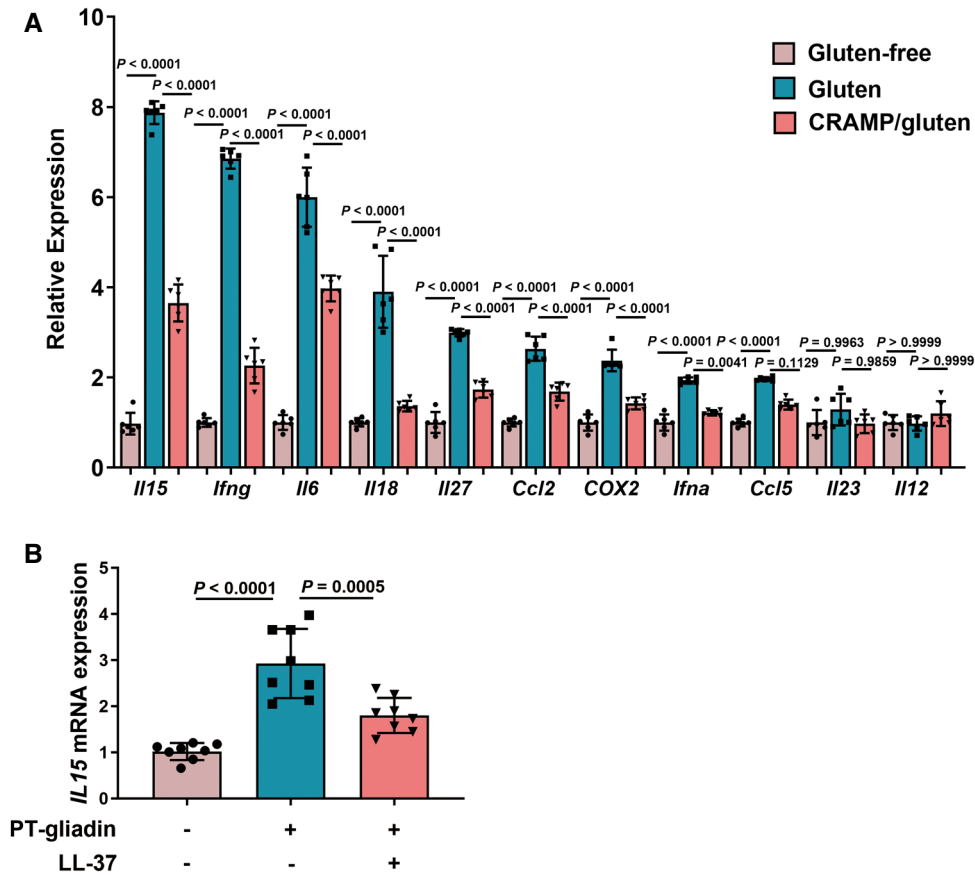

**Figure EV3. Cathelicidin regulates cytokine expression in GIE and IL-15 expression in PT-gliadin-stimulated human epithelial cells. Related to Fig 5.**

A The mRNA levels of cytokines in duodenum were measured by RT-qPCR ( $n = 6$ ).

B The mRNA levels of *IL15* *in vitro* were measured by RT-qPCR ( $n = 8$ ).

Data information: Data were representative and were the mean  $\pm$  SD from three (A) or four (B) independent experiments.  $P$  values were calculated by one-way ANOVA followed by Tukey's *post hoc* test for multiple comparisons.

Source data are available online for this figure.

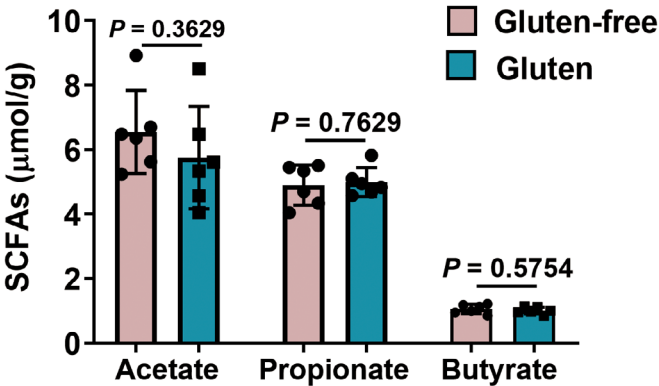

**Figure EV4. Faecal content of short-chain fatty acids in GIE. Related to Fig 6.**

Faecal levels of short-chain fatty acids (acetic acid, propionic acid and butyric acid) were measured by gas chromatography-mass spectrometer ( $n = 6$ ). Data were representative and were the mean  $\pm$  SD from three independent experiments.  $P$  values were calculated by unpaired two-tailed *t*-test for comparison of two groups.

Source data are available online for this figure.

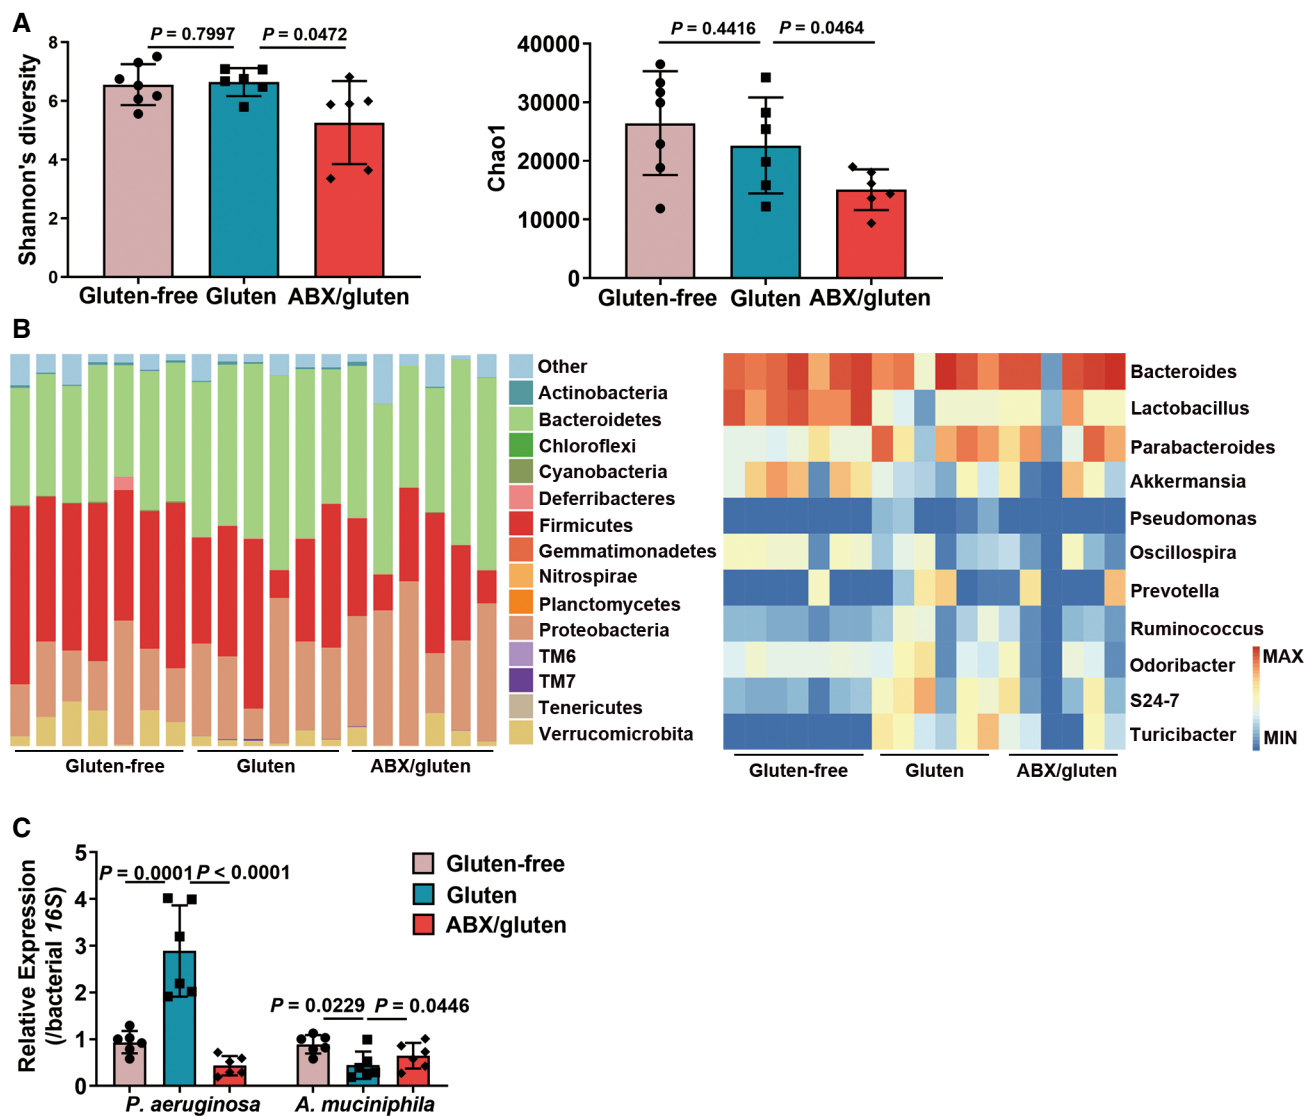

**Figure EV5.** The antibiotic cocktail treatment modulates gut microbiota composition, causing reduced *P. aeruginosa* and increased *A. muciniphila* during GIE. Related to Fig 7.

A Strain diversity (Left, Shannon's diversity; Right, Chao1 index; Gluten-free,  $n = 7$ ; Gluten,  $n = 6$ ; ABX/gluten,  $n = 6$ ).

B The taxonomic composition distributions at phylum (left) and genus (right) levels (Gluten-free,  $n = 7$ ; Gluten,  $n = 6$ ; ABX/gluten,  $n = 6$ ).

C Duodenal colonizing *P. aeruginosa* and *A. muciniphila* as determined by RT-qPCR using bacterial-specific species gene primers ( $n = 6$ ).

Data information: Data in A were representative and were the mean  $\pm$  SD. Data in C were representative and were the mean  $\pm$  SD from three independent experiments.  $P$  values were calculated by one-way ANOVA followed by Tukey's *post hoc* test for multiple comparisons.

Source data are available online for this figure.
